# Supplementary material
Source: publisher site journal article supplement (https://static.cambridge.org/content/id/urn:cambridge.org:id:article:S1047951119002543/resource/name/S1047951119002543supp001.docx)
Supplement: Supplementary file 1 [file S1047951119002543supp001.docx]

Legend for the supplementary echo view for the manuscript

CTY-19-May-211.R3

This is an apical view with tilting of the probe far anteriorly, visualizing the right ventricular (RV) outflow tract and the pulmonary artery (PA), with a connection/defect (arrow) between the pulmonary artery and the ascending aorta (AO).
